# Supplementary material for: Open and partially closed models of the solar wind interaction with outer planet magnetospheres: the case of Saturn
Source: Copernicus journal article supplement (doi:10.5194/angeo-35-1293-2017), 2017-12-06
Supplement: Supplementary file 1 [file angeo-35-1293-2017-supplement.zip]

Archive with 3 entries (3 files):
- 3DLinesAnimation.gif
- angeo-35-1293-2017-supplement-title-page.pdf
- Additional figures.pdf
