# Supplementary material for: Open and partially closed models of the solar wind interaction with outer planet magnetospheres: the case of Saturn
Source: Copernicus journal article supplement (doi:10.5194/angeo-35-1293-2017), 2017-12-06
Supplement: Supplementary file 1 [file angeo-35-1293-2017-supplement.zip › angeo-35-1293-2017-supplement-title-page.pdf]

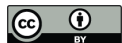

## *Supplement of*

# **Open and partially closed models of the solar wind interaction with outer planet magnetospheres: the case of Saturn**

**Elena S. Belenkaya et al.**

*Correspondence to:* Elena S. Belenkaya ([elena@dec1.sinp.msu.ru](mailto:elena@dec1.sinp.msu.ru))

- [angeo-35-1293-2017-supplement-title-page.pdf](#)
- [3DLinesAnimation.gif](#)
- [Additional figures.pdf](#)

The copyright of individual parts of the supplement might differ from the CC BY 3.0 License.
