# Supplementary figures and images for: Open and partially closed models of the solar wind interaction with outer planet magnetospheres: the case of Saturn
Source: Copernicus journal article supplement (doi:10.5194/angeo-35-1293-2017), 2017-12-06

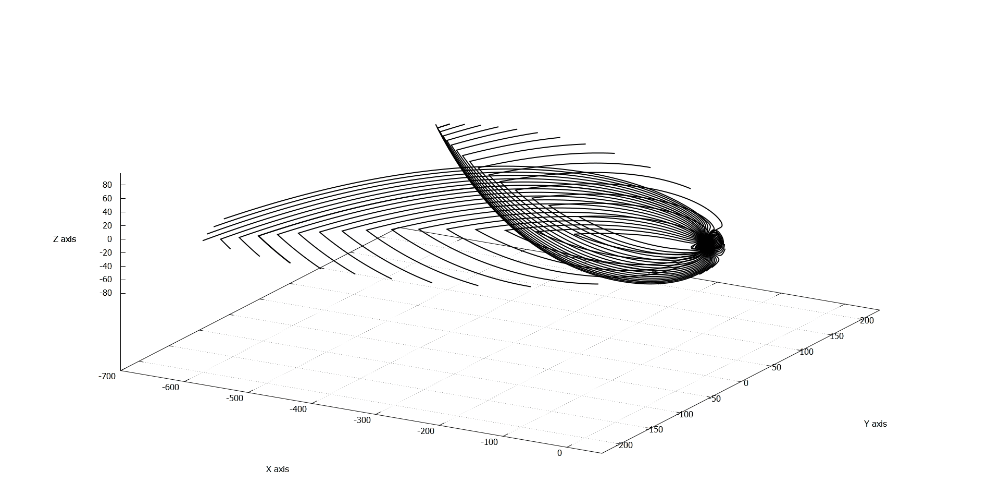

Supplement: Supplementary file 1 [file angeo-35-1293-2017-supplement.zip › 3DLinesAnimation.gif]
